# Supplementary material for: MAT Loci Play Crucial Roles in Sexual Development but Are Dispensable for Asexual Reproduction and Pathogenicity in Rice Blast Fungus Magnaporthe oryzae
Source: MDPI journal article supplement (doi:10.3390/jof7100858), 2021-10-13
Supplement: s1 [file s1]

**Table S1 Primers used in this work**

| Primer       | Sequence (5'-3')                               | Function            |
|--------------|------------------------------------------------|---------------------|
| HKOPB-1-1(1) | ATGTGTTGACCTCCAGGATCCCACATCCATCATACCCCTTCGGGA  | MAT loci disruption |
| HKOPB-1-1(2) | GCCAAGCTTGCATGCCTGCAGCAAGTAGCAGAGATGTGCCATCGG  | MAT loci disruption |
| HKOEX-1-1(1) | ATTATTATGGAGAAACTCGAGGTCGATACAAAGATCCCCCAGAGA  | MAT loci disruption |
| HKOEX-1-1(2) | CCGGGTACCGAGCTCGAATTCTGGAAGCACTTGAGGGAGGCGCCA  | MAT loci disruption |
| HKOPB-1-2(1) | ATGTGTTGACCTCCAGGATCCCTGGTCTCTGGCACTCTGAGCGTG  | MAT loci disruption |
| HKOPB-1-2(2) | GCCAAGCTTGCATGCCTGCAGACCAAAGAAGATGATCAGTCGGCC  | MAT loci disruption |
| HKOEX-1-2(1) | ATTATTATGGAGAAACTCGAGCGGAACACTTACCACATTCGAGTA  | MAT loci disruption |
| HKOEX-1-2(2) | CCGGGTACCGAGCTCGAATTCTGTAGATGTGCCTCGTTTCAATGAT | MAT loci disruption |
| SKOEX1-111   | CACGGTACCGAGCTCGAATTCTGGAAGCACTTGAGGGAGGCGCCA  | MAT gene disruption |
| SKOEX2-111   | ATTATTATGGAGAAACTCGAGGTCGATACAAAGATCCCCCAGAGA  | MAT gene disruption |
| SKOPB1-111   | GCCAAGCTTGCATGCCTGCAGCACCTGAGGCTCATCTGCTGAAGC  | MAT gene disruption |
| SKOPB2-111   | CTGTGGCGTTGGCACGGATCCTCAGACCATCTCAGGAGCTCATTT  | MAT gene disruption |
| HKOHB1-112   | ACGACGGCCAGTGCCAAGCTTTTCATATCACCCTTTCGTGCACAC  | MAT gene disruption |
| HKOHB2-112   | ATGTGTTGACCTCCAGGATCCTCGCGCGCGGCTACCTCTAAATCC  | MAT gene disruption |
| HKOSmK1-112  | AAAGGAATAGAGTAGCCCGGGCGCCGTTGACGCGACAGTCATGGA  | MAT gene disruption |
| HKOSmK2-112  | TACGAATTTCGAGCTCGGTACCCAGAGGTGGGAGATATATGCATGT | MAT gene disruption |
| SKOPB1-113   | GCCAAGCTTGCATGCCTGCAGGCAAGACCATGCATTTGATAGTAG  | MAT gene disruption |
| SKOPB2-113   | CTGTGGCGTTGGCACGGATCCTTGTGATATTTGCTGTAAGTGAAG  | MAT gene disruption |
| SKOEX1-113   | CACGGTACCGAGCTCGAATTCCACATCCATCATACCCCTTCGGGA  | MAT gene disruption |
| SKOEX2-113   | ATTATTATGGAGAAACTCGAGCAAGTAGCAGAGATGTGCCATCGG  | MAT gene disruption |
| HKOPB1-121   | GCCAAGCTTGCATGCCTGCAGCGGAACACTTACCACATTCGAGTA  | MAT gene disruption |
| HKOPB2-121   | ATGTGTTGACCTCCAGGATCCGTAGATGTGCCTCGTTTCAATGAT  | MAT gene disruption |
| HKOEX1-121   | CCGGGTACCGAGCTCGAATTTCGAGGTCACCATTACATCATCCGA  | MAT gene disruption |
| HKOEX2-121   | ATTATTATGGAGAAACTCGAGATATATGCATGTCGGAAAGTCCCCG | MAT gene disruption |
| HKOSmX1-122  | AAAGGAATAGAGTAGCCCGGGCTGAATATGTTTCGCTGGCAGATA  | MAT gene disruption |
| HKOSmX2-122  | ATTATTATGGAGAAACTCGAGTCCCTCCAAGACTCCGACATCACC  | MAT gene disruption |
| HKOPB1-122   | GCCAAGCTTGCATGCCTGCAGACCAAAGAAGATGATCAGTCGGCC  | MAT gene disruption |
| HKOPB2-122   | ATGTGTTGACCTCCAGGATCCCTGGTCTCTGGCACTCTGAGCGTG  | MAT gene disruption |
| 1-1Check2.1  | TCCCAGTCACAAATCCCTCACATT                       | Mutant confirmation |
| 1-1Check3.1  | GTTGCTTCTTCTTCTGCTGCCTCT                       | Mutant confirmation |

|              |                                                   |                                 |
|--------------|---------------------------------------------------|---------------------------------|
| 1-1Check2.2  | TCCCAGTCACAAATCCCTCACATT                          | Mutant confirmation             |
| 1-1Check3.2  | GCGCCAACTCCTTGATACGTTCTA                          | Mutant confirmation             |
| 1-1Check2.3  | CAGGCTCTGCTCTGTCCACTTCTT                          | Mutant confirmation             |
| 1-1Check3.3  | GATACCATTGGCGTTGATGTTTGT                          | Mutant confirmation             |
| 1-1Check1    | ATCGGAAGGGAGCACAGAAGTGGC                          | Mutant confirmation             |
| 1-1Check4    | CGACTTCCGTCAAGCGTTCCATAA                          | Mutant confirmation             |
| 1-2Check2.1  | GGGTCACGGATTTGTCTGGCTTTG                          | Mutant confirmation             |
| 1-2Check3.1  | GATTTCGCTCGCGTTCATGGATGG                          | Mutant confirmation             |
| 1-2Check2.2  | GGGTCACGGATTTGTCTGGCTTTG                          | Mutant confirmation             |
| 1-2Check3.2  | GCTCCTCCCACTCTGCCTTTGTCTG                         | Mutant confirmation             |
| 1-2Check1    | CGAGGCGGTTCCAGGCTGCAAAGA                          | Mutant confirmation             |
| 1-2Check4    | GGGAGACACGCAAGAACGCACGAC                          | Mutant confirmation             |
| HPH-UP       | TCCTGACGGACAATGGCCGCATAA                          | Mutant confirmation             |
| HPH-DN       | GGCGCAGCTATTTACCCGCAGGAC                          | Mutant confirmation             |
| HPH1         | GCTCCATACAAGCCAACC                                | Mutant confirmation             |
| HPH2         | CTTCTTAAGTTCGCCCTTCC                              | Mutant confirmation             |
| RECPB-1-1(1) | GAGCTCGGTACCCGGGGATCCGTCGATACAAAGATCCCCCAGAGA     | MAT loci complement             |
| RECPB-1-1(2) | GCCAAGCTTGCAATGCCTGCAGCAAGTAGCAGAGATGTGCCATCGG    | MAT loci complement             |
| RECPB-1-2(1) | GAGCTCGGTACCCGGGGATCCCGGAACACTTACCACATTCGAGTA     | MAT loci complement             |
| RECPB-1-2(2) | GCCAAGCTTGCAATGCCTGCAGACCAAAGAAGATGATCAGTCGGCC    | MAT loci complement             |
| REC-111(1)   | GCCAAGCTTGCAATGCCTGCAGCACCTGAGGCTCATCTGCTGAAGCGAT | MAT gene complement             |
| REC-111(2)   | GAGCTCGGTACCCGGGGATCCGTCGATACAAAGATCCCCCAGAGACGC  | MAT gene complement             |
| REC-112(1)   | GCCAAGCTTGCAATGCCTGCAGCAGAGGTGGGAGATATATGCATGTCGG | MAT gene complement             |
| REC-112(2)   | GAGCTCGGTACCCGGGGATCCTTCATATCACCCCTTTCGTGCACACATT | MAT gene complement             |
| REC-113(1)   | GCCAAGCTTGCAATGCCTGCAGCAAGTAGCAGAGATGTGCCATCGGAAA | MAT gene complement             |
| REC-113(2)   | GAGCTCGGTACCCGGGGATCCGCAAGACCATGCATTTGATAGTAGTTG  | MAT gene complement             |
| REC-121(1)   | GCCAAGCTTGCAATGCCTGCAGATATATGCATGTCCGAAAGTCCCGAAG | MAT gene complement             |
| REC-121(2)   | GAGCTCGGTACCCGGGGATCCCGGAACACTTACCACATTCGAGTATCC  | MAT gene complement             |
| REC-122(1)   | GCCAAGCTTGCAATGCCTGCAGACCAAAGAAGATGATCAGTCGGCCAAG | MAT gene complement             |
| REC-122(2)   | GAGCTCGGTACCCGGGGATCCTCCCTCCAAGACTCCGACATCACCAAA  | MAT gene complement             |
| 111check 2   | GCTGGCATCTTTCAGGATAGACCG                          | Confirmation of gene complement |
| 111check 3   | GTGTTTCCGGGTGACCATGACCTT                          | Confirmation of gene complement |
| 112check 2   | GCAGGTCTAGGACCCGATGAAACA                          | Confirmation of gene complement |
| 112check 3   | GGA ACTCTTAGGCGATAGCAGCAT                         | Confirmation of gene complement |

|               |                          |                                |
|---------------|--------------------------|--------------------------------|
| 113check 2    | TCAATCTGCCACCACAGCGTCCTC | Confirmation of gene complment |
| 113check 3    | CCACCTTGTCACCGTCGCCCTTCT | Confirmation of gene complment |
| 121Check2     | AGGGTCACGGATTTGTCTG      | Confirmation of gene complment |
| 121Check3     | TTGCTTTGCTCGGCTTCG       | Confirmation of gene complment |
| 122Check2     | TGGGTCGTCTGCGTTCCT       | Confirmation of gene complment |
| 122Check3     | TGCTGCTCCTGTTGCTTC       | Confirmation of gene complment |
| bar1          | CCAGAAACCCACGTCATGCCAGTT | Confirmation of gene complment |
| bar2          | AGTCGTCCAGGCGGTGAGCACAAA | Confirmation of gene complment |
| MAT111-RT-F1  | GTTAGCCCCGAGAGCGGTAGCA   | qRT-PCR assay                  |
| MAT111-RT-R1  | TCCTGAAAGATGCCAGCGTAG    | qRT-PCR assay                  |
| MAT112-RT-F1  | ATGGAAAACCAGAGCCAGAGGA   | qRT-PCR assay                  |
| MAT112-RT-R1  | CTGCTATCGCCTAAGAGTTCCG   | qRT-PCR assay                  |
| 113 F1        | CTACGAGAACAGCATAGTGGCGAG | qRT-PCR assay                  |
| 113 R1        | GATGCCGCAAACTTTGCCTAGCGA | qRT-PCR assay                  |
| MAT121-RT-F2  | ACAGCACAGAACTTTTCCCAGC   | qRT-PCR assay                  |
| MAT121-RT-R2  | AGGCTCTCATCACCTACCATCG   | qRT-PCR assay                  |
| MAT122-RT-F2  | GCCGCGTTGATTCTCCTCCTCAAT | qRT-PCR assay                  |
| MAT122-RT-R2  | ACTTGGCGGCACGGTAGAG      | qRT-PCR assay                  |
| RT-Tubulin-F3 | GGCCAATGCGGCAACCAA       | qRT-PCR assay                  |
| RT-Tubulin-R3 | AGGACAGCACGGGGAACA       | qRT-PCR assay                  |

---
